# Supplementary material for: Cardioprotective Effects of Dexmedetomidine in an Oxidative-Stress In Vitro Model of Neonatal Rat Cardiomyocytes
Source: MDPI journal article supplement (doi:10.3390/antiox12061206), 2023-06-02
Supplement: s1 [file s1]

**Table S6.** Quantification of tissue structure (H9c2 and NRCM)

| Hypoxia (5% O <sub>2</sub> )    |      |               |               |               |               |
|---------------------------------|------|---------------|---------------|---------------|---------------|
| dexmedetomidine                 |      | –             | 0.1 $\mu$ M   | 1 $\mu$ M     | 10 $\mu$ M    |
| TNNT2                           | H9c2 | 109 $\pm$ 3.2 | 88 $\pm$ 7.1  | 85 $\pm$ 7.7  | 73 $\pm$ 3.9  |
| TNNT2                           | NRCM | 82 $\pm$ 8.5  | 88 $\pm$ 6.9  | 95 $\pm$ 5.8  | 94 $\pm$ 8.8  |
| Timp1                           | H9c2 | 97 $\pm$ 4.4  | 98 $\pm$ 4.3  | 103 $\pm$ 6.4 | 91 $\pm$ 5.9  |
| Timp1                           | NRCM | 83 $\pm$ 9.0  | 94 $\pm$ 6.2  | 97 $\pm$ 4.3  | 99 $\pm$ 5.5  |
| Timp2                           | H9c2 | 100 $\pm$ 5.5 | 86 $\pm$ 5.1  | 95 $\pm$ 4.6  | 97 $\pm$ 5.2  |
| Timp2                           | NRCM | 68 $\pm$ 6.0  | 69 $\pm$ 5.1  | 79 $\pm$ 6.7  | 94 $\pm$ 6.2  |
| Normoxia (21% O <sub>2</sub> )  |      |               |               |               |               |
| dexmedetomidine                 |      | –             | 0.1 $\mu$ M   | 1 $\mu$ M     | 10 $\mu$ M    |
| TNNT2                           | H9c2 | 100 $\pm$ 0.0 | 90 $\pm$ 6.8  | 82 $\pm$ 3.6  | 85 $\pm$ 5.1  |
| TNNT2                           | NRCM | 100 $\pm$ 0.0 | 93 $\pm$ 8.3  | 110 $\pm$ 4.6 | 97 $\pm$ 8.1  |
| Timp1                           | H9c2 | 100 $\pm$ 0.0 | 92 $\pm$ 5.2  | 90 $\pm$ 7.1  | 96 $\pm$ 7.2  |
| Timp1                           | NRCM | 100 $\pm$ 0.0 | 89 $\pm$ 5.6  | 107 $\pm$ 5.7 | 107 $\pm$ 6.8 |
| Timp2                           | H9c2 | 100 $\pm$ 0.0 | 93 $\pm$ 6.2  | 92 $\pm$ 7.5  | 105 $\pm$ 5.7 |
| Timp2                           | NRCM | 100 $\pm$ 0.0 | 83 $\pm$ 4.2  | 93 $\pm$ 5.7  | 98 $\pm$ 2.5  |
| Hyperoxia (80% O <sub>2</sub> ) |      |               |               |               |               |
| dexmedetomidine                 |      | –             | 0.1 $\mu$ M   | 1 $\mu$ M     | 10 $\mu$ M    |
| TNNT2                           | H9c2 | 140 $\pm$ 7.4 | 89 $\pm$ 11.4 | 80 $\pm$ 8.4  | 79 $\pm$ 4.4  |
| TNNT2                           | NRCM | 47 $\pm$ 6.6  | 58 $\pm$ 7.5  | 57 $\pm$ 5.1  | 39 $\pm$ 4.6  |
| Timp1                           | H9c2 | 140 $\pm$ 4.2 | 83 $\pm$ 8.8  | 93 $\pm$ 8.0  | 90 $\pm$ 8.2  |
| Timp1                           | NRCM | 140 $\pm$ 6.8 | 90 $\pm$ 12.5 | 95 $\pm$ 8.4  | 80 $\pm$ 10.3 |
| Timp2                           | H9c2 | 143 $\pm$ 4.1 | 85 $\pm$ 6.1  | 115 $\pm$ 2.7 | 114 $\pm$ 2.5 |
| Timp2                           | NRCM | 124 $\pm$ 3.3 | 87 $\pm$ 8.4  | 98 $\pm$ 7.5  | 89 $\pm$ 9.7  |

Data are normalized to the level of cardiomyocytes exposed to normoxia (100%) and are presented as mean (%)  $\pm$  standard error of the mean (SEM). n = 6 individual experiments/group.
