# Supplementary material for: Cardioprotective Effects of Dexmedetomidine in an Oxidative-Stress In Vitro Model of Neonatal Rat Cardiomyocytes
Source: MDPI journal article supplement (doi:10.3390/antiox12061206), 2023-06-02
Supplement: s1 [file s1]

**Table S7.** Quantification of Hippo signaling (H9c2 and NRCM)

| Hypoxia (5% O <sub>2</sub> )    |      |                |                |                |                |
|---------------------------------|------|----------------|----------------|----------------|----------------|
| dexmedetomidine                 |      | –              | 0.1 $\mu$ M    | 1 $\mu$ M      | 10 $\mu$ M     |
| CUL7                            | H9c2 | 61 $\pm$ 5.0   | 74 $\pm$ 10.4  | 87 $\pm$ 8.8   | 101 $\pm$ 5.6  |
| CUL7                            | NRCM | 47 $\pm$ 8.5   | 56 $\pm$ 8.2   | 89 $\pm$ 6.9   | 91 $\pm$ 8.4   |
| Lats2                           | H9c2 | 141 $\pm$ 7.4  | 79 $\pm$ 12.9  | 107 $\pm$ 2.7  | 108 $\pm$ 10.3 |
| Lats2                           | NRCM | 122 $\pm$ 1.1  | 72 $\pm$ 6.0   | 84 $\pm$ 9.4   | 78 $\pm$ 8.5   |
| Tead1                           | H9c2 | 57 $\pm$ 7.2   | 58 $\pm$ 10.7  | 82 $\pm$ 5.8   | 90 $\pm$ 9.1   |
| Tead1                           | NRCM | 68 $\pm$ 2.9   | 91 $\pm$ 10.9  | 96 $\pm$ 9.3   | 82 $\pm$ 6.6   |
| YAP1                            | H9c2 | 83 $\pm$ 2.6   | 80 $\pm$ 12.8  | 95 $\pm$ 5.7   | 93 $\pm$ 8.5   |
| YAP1                            | NRCM | 84 $\pm$ 8.4   | 70 $\pm$ 6.0   | 103 $\pm$ 6.1  | 89 $\pm$ 3.0   |
| Normoxia (21% O <sub>2</sub> )  |      |                |                |                |                |
| dexmedetomidine                 |      | –              | 0.1 $\mu$ M    | 1 $\mu$ M      | 10 $\mu$ M     |
| CUL7                            | H9c2 | 100 $\pm$ 0.0  | 82 $\pm$ 11.2  | 91 $\pm$ 7.8   | 98 $\pm$ 9.2   |
| CUL7                            | NRCM | 100 $\pm$ 0.0  | 77 $\pm$ 3.2   | 72 $\pm$ 9.1   | 73 $\pm$ 12.2  |
| Lats2                           | H9c2 | 100 $\pm$ 0.0  | 100 $\pm$ 9.6  | 94 $\pm$ 6.5   | 107 $\pm$ 7.2  |
| Lats2                           | NRCM | 100 $\pm$ 0.0  | 84 $\pm$ 3.6   | 103 $\pm$ 4.8  | 112 $\pm$ 3.6  |
| Tead1                           | H9c2 | 100 $\pm$ 0.0  | 74 $\pm$ 4.4   | 78 $\pm$ 11.6  | 94 $\pm$ 6.3   |
| Tead1                           | NRCM | 100 $\pm$ 0.0  | 82 $\pm$ 4.4   | 89 $\pm$ 5.8   | 94 $\pm$ 8.9   |
| YAP1                            | H9c2 | 100 $\pm$ 0.0  | 79 $\pm$ 12.7  | 84 $\pm$ 8.9   | 91 $\pm$ 8.7   |
| YAP1                            | NRCM | 100 $\pm$ 0.0  | 80 $\pm$ 7.7   | 76 $\pm$ 2.0   | 97 $\pm$ 8.1   |
| Hyperoxia (80% O <sub>2</sub> ) |      |                |                |                |                |
| dexmedetomidine                 |      | –              | 0.1 $\mu$ M    | 1 $\mu$ M      | 10 $\mu$ M     |
| CUL7                            | H9c2 | 48 $\pm$ 6.1   | 57 $\pm$ 8.7   | 91 $\pm$ 9.8   | 104 $\pm$ 3.9  |
| CUL7                            | NRCM | 48 $\pm$ 10.1  | 70 $\pm$ 17.2  | 88 $\pm$ 11.1  | 86 $\pm$ 13.7  |
| Lats2                           | H9c2 | 148 $\pm$ 7.6  | 70 $\pm$ 9.7   | 82 $\pm$ 7.6   | 96 $\pm$ 9.8   |
| Lats2                           | NRCM | 136 $\pm$ 5.1  | 84 $\pm$ 15.1  | 93 $\pm$ 15.9  | 103 $\pm$ 8.2  |
| Tead1                           | H9c2 | 59 $\pm$ 10.6  | 72 $\pm$ 5.5   | 93 $\pm$ 6.5   | 102 $\pm$ 4.5  |
| Tead1                           | NRCM | 48 $\pm$ 12.4  | 91 $\pm$ 11.7  | 87 $\pm$ 5.7   | 79 $\pm$ 9.7   |
| YAP1                            | H9c2 | 159 $\pm$ 7.1  | 77 $\pm$ 10.3  | 87 $\pm$ 6.6   | 93 $\pm$ 8.4   |
| YAP1                            | NRCM | 225 $\pm$ 32.4 | 118 $\pm$ 10.9 | 102 $\pm$ 16.6 | 101 $\pm$ 13.0 |

Data are normalized to the level of cardiomyocytes exposed to normoxia (100%) and are presented as mean (%)  $\pm$  standard error of the mean (SEM). n = 6 individual experiments/group.
