# Supplementary material for: Cardioprotective Effects of Dexmedetomidine in an Oxidative-Stress In Vitro Model of Neonatal Rat Cardiomyocytes
Source: MDPI journal article supplement (doi:10.3390/antiox12061206), 2023-06-02
Supplement: s1 [file s1]

**Table S5.** Quantification of oxidative stress response (H9c2 and NRCM)

| Hypoxia (5% O <sub>2</sub> )    |      |                |                |                |                |
|---------------------------------|------|----------------|----------------|----------------|----------------|
| dexmedetomidine                 |      | –              | 0.1 $\mu$ M    | 1 $\mu$ M      | 10 $\mu$ M     |
| GCLC                            | H9c2 | 88 $\pm$ 6.6   | 70 $\pm$ 11.3  | 78 $\pm$ 7.9   | 74 $\pm$ 5.3   |
| GCLC                            | NRCM | 53 $\pm$ 6.6   | 48 $\pm$ 6.1   | 73 $\pm$ 1.0   | 77 $\pm$ 5.8   |
| Nrf2                            | H9c2 | 96 $\pm$ 5.3   | 96 $\pm$ 1.8   | 95 $\pm$ 3.5   | 98 $\pm$ 3.9   |
| Nrf2                            | NRCM | 65 $\pm$ 12.4  | 63 $\pm$ 6.8   | 76 $\pm$ 9.1   | 93 $\pm$ 9.7   |
| Hif1 $\alpha$                   | H9c2 | 147 $\pm$ 3.2  | 85 $\pm$ 7.7   | 107 $\pm$ 5.1  | 108 $\pm$ 6.9  |
| Hif1 $\alpha$                   | NRCM | 133 $\pm$ 5.5  | 86 $\pm$ 7.8   | 92 $\pm$ 6.6   | 87 $\pm$ 5.2   |
| Normoxia (21% O <sub>2</sub> )  |      |                |                |                |                |
| dexmedetomidine                 |      | –              | 0.1 $\mu$ M    | 1 $\mu$ M      | 10 $\mu$ M     |
| GCLC                            | H9c2 | 100 $\pm$ 0.0  | 95 $\pm$ 7.5   | 89 $\pm$ 7.7   | 104 $\pm$ 6.4  |
| GCLC                            | NRCM | 100 $\pm$ 0.0  | 72 $\pm$ 5.4   | 55 $\pm$ 5.2   | 88 $\pm$ 6.5   |
| Nrf2                            | H9c2 | 100 $\pm$ 0.0  | 76 $\pm$ 4.5   | 71 $\pm$ 5.0   | 75 $\pm$ 3.3   |
| Nrf2                            | NRCM | 100 $\pm$ 0.0  | 70 $\pm$ 6.2   | 91 $\pm$ 11.4  | 93 $\pm$ 9.9   |
| Hif1 $\alpha$                   | H9c2 | 100 $\pm$ 0.0  | 91 $\pm$ 5.9   | 74 $\pm$ 2.5   | 96 $\pm$ 7.3   |
| Hif1 $\alpha$                   | NRCM | 100 $\pm$ 0.0  | 87 $\pm$ 6.9   | 96 $\pm$ 5.9   | 92 $\pm$ 3.5   |
| Hyperoxia (80% O <sub>2</sub> ) |      |                |                |                |                |
| dexmedetomidine                 |      | –              | 0.1 $\mu$ M    | 1 $\mu$ M      | 10 $\mu$ M     |
| GCLC                            | H9c2 | 167 $\pm$ 10.9 | 97 $\pm$ 13.5  | 117 $\pm$ 11.9 | 111 $\pm$ 6.6  |
| GCLC                            | NRCM | 299 $\pm$ 7.7  | 200 $\pm$ 25.1 | 212 $\pm$ 9.9  | 138 $\pm$ 19.5 |
| Nrf2                            | H9c2 | 190 $\pm$ 2.9  | 70 $\pm$ 1.7   | 83 $\pm$ 5.9   | 96 $\pm$ 8.6   |
| Nrf2                            | NRCM | 134 $\pm$ 5.3  | 108 $\pm$ 6.7  | 96 $\pm$ 10.5  | 93 $\pm$ 5.9   |
| Hif1 $\alpha$                   | H9c2 | 103 $\pm$ 2.7  | 102 $\pm$ 5.8  | 80 $\pm$ 7.9   | 86 $\pm$ 5.1   |
| Hif1 $\alpha$                   | NRCM | 87 $\pm$ 9.0   | 93 $\pm$ 9.6   | 87 $\pm$ 8.4   | 89 $\pm$ 8.2   |

Data are normalized to the level of cardiomyocytes exposed to normoxia (100%) and are presented as mean (%)  $\pm$  standard error of the mean (SEM). n = 6 individual experiments/group.
