# Supplementary material for: Cardioprotective Effects of Dexmedetomidine in an Oxidative-Stress In Vitro Model of Neonatal Rat Cardiomyocytes
Source: MDPI journal article supplement (doi:10.3390/antiox12061206), 2023-06-02
Supplement: s1 [file s1]

**Table S4.** Quantification of autophagy factors (H9c2 and NRCM)

| Hypoxia (5% O <sub>2</sub> )    |      |                |               |               |                |
|---------------------------------|------|----------------|---------------|---------------|----------------|
| dexmedetomidine                 |      | –              | 0.1 $\mu$ M   | 1 $\mu$ M     | 10 $\mu$ M     |
| Atg5                            | H9c2 | 130 $\pm$ 5.0  | 91 $\pm$ 6.2  | 112 $\pm$ 8.3 | 96 $\pm$ 8.3   |
| Atg5                            | NRCM | 51 $\pm$ 3.8   | 57 $\pm$ 3.8  | 66 $\pm$ 4.8  | 69 $\pm$ 4.9   |
| Atg12                           | H9c2 | 148 $\pm$ 12.2 | 91 $\pm$ 7.1  | 86 $\pm$ 14.3 | 94 $\pm$ 8.7   |
| Atg12                           | NRCM | 46 $\pm$ 8.0   | 55 $\pm$ 5.8  | 66 $\pm$ 6.2  | 71 $\pm$ 8.8   |
| Normoxia (21% O <sub>2</sub> )  |      |                |               |               |                |
| dexmedetomidine                 |      | –              | 0.1 $\mu$ M   | 1 $\mu$ M     | 10 $\mu$ M     |
| Atg5                            | H9c2 | 100 $\pm$ 0.0  | 88 $\pm$ 8.6  | 89 $\pm$ 4.1  | 93 $\pm$ 3.7   |
| Atg5                            | NRCM | 100 $\pm$ 0.0  | 80 $\pm$ 5.8  | 87 $\pm$ 7.9  | 86 $\pm$ 6.9   |
| Atg12                           | H9c2 | 100 $\pm$ 0.0  | 92 $\pm$ 5.7  | 87 $\pm$ 9.1  | 82 $\pm$ 9.5   |
| Atg12                           | NRCM | 100 $\pm$ 0.0  | 85 $\pm$ 4.6  | 90 $\pm$ 5.6  | 85 $\pm$ 5.8   |
| Hyperoxia (80% O <sub>2</sub> ) |      |                |               |               |                |
| dexmedetomidine                 |      | –              | 0.1 $\mu$ M   | 1 $\mu$ M     | 10 $\mu$ M     |
| Atg5                            | H9c2 | 137 $\pm$ 5.9  | 88 $\pm$ 5.9  | 86 $\pm$ 8.7  | 102 $\pm$ 11.2 |
| Atg5                            | NRCM | 46 $\pm$ 6.8   | 58 $\pm$ 11.4 | 66 $\pm$ 12.1 | 52 $\pm$ 9.7   |
| Atg12                           | H9c2 | 142 $\pm$ 8.6  | 89 $\pm$ 6.3  | 81 $\pm$ 14.3 | 97 $\pm$ 11.4  |
| Atg12                           | NRCM | 37 $\pm$ 9.5   | 62 $\pm$ 15.9 | 84 $\pm$ 6.3  | 69 $\pm$ 8.2   |

Data are normalized to the level of cardiomyocytes exposed to normoxia (100%) and are presented as mean (%)  $\pm$  standard error of the mean (SEM). n = 6 individual experiments/group.
