# Supplementary material for: Cardioprotective Effects of Dexmedetomidine in an Oxidative-Stress In Vitro Model of Neonatal Rat Cardiomyocytes
Source: MDPI journal article supplement (doi:10.3390/antiox12061206), 2023-06-02
Supplement: s1 [file s1]

**Table S1.** Quantification of co-labeled Ki67-/  $\alpha$ -actinin cardiomyocytes (H9c2 and NRCM)

| Hypoxia (5% O <sub>2</sub> )    |      |                |                |                |                |
|---------------------------------|------|----------------|----------------|----------------|----------------|
| dexmedetomidine                 |      | –              | 0.1 $\mu$ M    | 1 $\mu$ M      | 10 $\mu$ M     |
| Ki67+                           | H9c2 | 49 $\pm$ 4.3   | 80 $\pm$ 5.2   | 83 $\pm$ 4.3   | 66 $\pm$ 5.1   |
| Hypertrophy                     | H9c2 | 111 $\pm$ 4.7  | 94 $\pm$ 5.2   | 92 $\pm$ 6.2   | 100 $\pm$ 4.7  |
| CycD2                           | H9c2 | 57 $\pm$ 4.4   | 78 $\pm$ 6.2   | 91 $\pm$ 5.8   | 96 $\pm$ 4.8   |
| CycD2                           | NRCM | 61 $\pm$ 2.4   | 77 $\pm$ 8.8   | 96 $\pm$ 8.0   | 95 $\pm$ 6.6   |
| Normoxia (21% O <sub>2</sub> )  |      |                |                |                |                |
| dexmedetomidine                 |      | –              | 0.1 $\mu$ M    | 1 $\mu$ M      | 10 $\mu$ M     |
| Ki67+                           | H9c2 | 100 $\pm$ 10.9 | 117 $\pm$ 8.1  | 112 $\pm$ 11.4 | 99 $\pm$ 10.4  |
| Hypertrophy                     | H9c2 | 100 $\pm$ 3.7  | 87 $\pm$ 3.2   | 94 $\pm$ 5.8   | 115 $\pm$ 5.7  |
| CycD2                           | H9c2 | 100 $\pm$ 0.0  | 79 $\pm$ 7.9   | 81 $\pm$ 5.8   | 99 $\pm$ 3.1   |
| CycD2                           | NRCM | 100 $\pm$ 0.0  | 81 $\pm$ 4.5   | 90 $\pm$ 7.6   | 80 $\pm$ 5.2   |
| Hyperoxia (80% O <sub>2</sub> ) |      |                |                |                |                |
| dexmedetomidine                 |      | –              | 0.1 $\mu$ M    | 1 $\mu$ M      | 10 $\mu$ M     |
| Ki67+                           | H9c2 | 42 $\pm$ 8.8   | 60 $\pm$ 6.1   | 59 $\pm$ 7.1   | 48 $\pm$ 6.1   |
| Hypertrophy                     | H9c2 | 209 $\pm$ 21.9 | 196 $\pm$ 24.9 | 184 $\pm$ 28.3 | 203 $\pm$ 20.6 |
| CycD2                           | H9c2 | 66 $\pm$ 4.7   | 96 $\pm$ 6.4   | 110 $\pm$ 5.9  | 109 $\pm$ 4.2  |
| CycD2                           | NRCM | 57 $\pm$ 5.5   | 84 $\pm$ 13.8  | 84 $\pm$ 4.1   | 95 $\pm$ 2.4   |

Data are normalized to the level of cardiomyocytes exposed to normoxia (100%) and are presented as mean (%)  $\pm$  standard error of the mean (SEM). n = 6 individual experiments/group.
