# Supplementary material for: Cardioprotective Effects of Dexmedetomidine in an Oxidative-Stress In Vitro Model of Neonatal Rat Cardiomyocytes
Source: MDPI journal article supplement (doi:10.3390/antiox12061206), 2023-06-02
Supplement: s1 [file s1]

**Table S3.** Quantification of apoptosis factors (H9c2 and NRCM)

| Hypoxia (5% O <sub>2</sub> )    |      |                |                |               |               |
|---------------------------------|------|----------------|----------------|---------------|---------------|
| dexmedetomidine                 |      | –              | 0.1 $\mu$ M    | 1 $\mu$ M     | 10 $\mu$ M    |
| Casp3                           | H9c2 | 153 $\pm$ 5.6  | 86 $\pm$ 3.5   | 89 $\pm$ 5.4  | 82 $\pm$ 7.6  |
| Casp3                           | NRCM | 127 $\pm$ 3.0  | 66 $\pm$ 3.4   | 74 $\pm$ 7.2  | 81 $\pm$ 3.7  |
| Casp8                           | H9c2 | 134 $\pm$ 10.8 | 69 $\pm$ 9.8   | 76 $\pm$ 12.4 | 74 $\pm$ 11.4 |
| Casp8                           | NRCM | 150 $\pm$ 15.7 | 80 $\pm$ 6.3   | 83 $\pm$ 6.5  | 85 $\pm$ 10.0 |
| AIF                             | H9c2 | 142 $\pm$ 8.1  | 78 $\pm$ 8.6   | 104 $\pm$ 7.5 | 78 $\pm$ 8.1  |
| AIF                             | NRCM | 45 $\pm$ 5.5   | 54 $\pm$ 3.7   | 73 $\pm$ 8.0  | 71 $\pm$ 3.7  |
| Normoxia (21% O <sub>2</sub> )  |      |                |                |               |               |
| dexmedetomidine                 |      | –              | 0.1 $\mu$ M    | 1 $\mu$ M     | 10 $\mu$ M    |
| Casp3                           | H9c2 | 100 $\pm$ 0.0  | 85 $\pm$ 10.3  | 90 $\pm$ 9.7  | 97 $\pm$ 7.2  |
| Casp3                           | NRCM | 100 $\pm$ 0.0  | 92 $\pm$ 5.1   | 92 $\pm$ 4.7  | 93 $\pm$ 4.8  |
| Casp8                           | H9c2 | 100 $\pm$ 0.0  | 94 $\pm$ 7.1   | 90 $\pm$ 8.6  | 85 $\pm$ 6.2  |
| Casp8                           | NRCM | 100 $\pm$ 0.0  | 85 $\pm$ 11.3  | 84 $\pm$ 10.4 | 80 $\pm$ 4.2  |
| AIF                             | H9c2 | 100 $\pm$ 0.0  | 91 $\pm$ 10.5  | 84 $\pm$ 8.1  | 98 $\pm$ 7.6  |
| AIF                             | NRCM | 100 $\pm$ 0.0  | 96 $\pm$ 3.6   | 88 $\pm$ 5.7  | 90 $\pm$ 4.8  |
| Hyperoxia (80% O <sub>2</sub> ) |      |                |                |               |               |
| dexmedetomidine                 |      | –              | 0.1 $\mu$ M    | 1 $\mu$ M     | 10 $\mu$ M    |
| Casp3                           | H9c2 | 162 $\pm$ 10.2 | 102 $\pm$ 14.2 | 96 $\pm$ 13.4 | 88 $\pm$ 4.9  |
| Casp3                           | NRCM | 137 $\pm$ 1.5  | 81 $\pm$ 9.4   | 78 $\pm$ 6.5  | 82 $\pm$ 5.2  |
| Casp8                           | H9c2 | 145 $\pm$ 10.8 | 78 $\pm$ 10.2  | 87 $\pm$ 8.3  | 78 $\pm$ 8.3  |
| Casp8                           | NRCM | 164 $\pm$ 33.8 | 92 $\pm$ 12.2  | 112 $\pm$ 6.6 | 109 $\pm$ 6.0 |
| AIF                             | H9c2 | 157 $\pm$ 14.2 | 90 $\pm$ 6.8   | 94 $\pm$ 7.3  | 85 $\pm$ 7.3  |
| AIF                             | NRCM | 29 $\pm$ 0.6   | 50 $\pm$ 12.8  | 48 $\pm$ 9.6  | 36 $\pm$ 6.0  |

Data are normalized to the level of cardiomyocytes exposed to normoxia (100%) and are presented as mean (%)  $\pm$  standard error of the mean (SEM). n = 6 individual experiments/group.
