# Supplementary material for: Cardioprotective Effects of Dexmedetomidine in an Oxidative-Stress In Vitro Model of Neonatal Rat Cardiomyocytes
Source: MDPI journal article supplement (doi:10.3390/antiox12061206), 2023-06-02
Supplement: s1 [file s1]

**Table S2.** Quantification of cytotoxicity (H9c2 and NRCM)

| Hypoxia (5% O <sub>2</sub> )    |      |          |          |         |          |
|---------------------------------|------|----------|----------|---------|----------|
| dexmedetomidine                 |      | –        | 0.1 µM   | 1 µM    | 10 µM    |
| LDH                             | H9c2 | 120±10.9 | 109±7.4  | 105±5.7 | 118±1.9  |
| LDH                             | NRCM | 102±6.1  | 89±2.9   | 97±7.5  | 83±8.1   |
| CCK-8                           | H9c2 | 90±3.9   | 89±2.4   | 83±3.5  | 84±3.2   |
| Normoxia (21% O <sub>2</sub> )  |      |          |          |         |          |
| dexmedetomidine                 |      | –        | 0.1 µM   | 1 µM    | 10 µM    |
| LDH                             | H9c2 | 100±0.0  | 84±0.7   | 91±2.8  | 92±2.8   |
| LDH                             | NRCM | 100±0.0  | 91±4.9   | 87±7.5  | 88±3.0   |
| CCK-8                           | H9c2 | 100±1.9  | 92±2.4   | 90±1.4  | 93±1.8   |
| Hyperoxia (80% O <sub>2</sub> ) |      |          |          |         |          |
| dexmedetomidine                 |      | –        | 0.1 µM   | 1 µM    | 10 µM    |
| LDH                             | H9c2 | 120±6.7  | 106±4.4  | 103±3.7 | 106±3.9  |
| LDH                             | NRCM | 192±5.4  | 157±21.4 | 174±8.5 | 164±20.8 |
| CCK-8                           | H9c2 | 77±3.1   | 81±2.5   | 71±2.9  | 73±3.0   |

Data are normalized to the level of cardiomyocytes exposed to normoxia (100%) and are presented as mean (%) ± standard error of the mean (SEM). n = 6 individual experiments/group.
